# Supplementary material for: After the bell: adolescents’ organised leisure-time activities and well-being in the context of social and socioeconomic inequalities
Source: HighWire-hosted journal article supplement (doi:10.1136/jech-2020-215319), 2021-01-05
Supplement: jech-2020-215319supp001_data_supplement.pdf [file jech-2020-215319supp001_data_supplement.pdf]

**Supplementary Table 1** Associations between participation in OLTAs and selected well-being indicators: Results from adjusted 3-level linear and logistic regression models with mixed effects; including the *breadth* of OLTA × FAS interaction term. Nine countries from the 2017/18 HBS study.

|                                      | Life satisfaction<br>(n = 45 683) |                     | Psychological complaints<br>(n = 44 693) |                     | Somatic complaints<br>(n = 44 754) |                   | Excellent self-rated health<br>(n = 45 900) |                     |
|--------------------------------------|-----------------------------------|---------------------|------------------------------------------|---------------------|------------------------------------|-------------------|---------------------------------------------|---------------------|
|                                      | β                                 | (95% CI)            | β                                        | (95% CI)            | β                                  | (95% CI)          | OR                                          | (95% CI)            |
| <b>Main effects</b>                  |                                   |                     |                                          |                     |                                    |                   |                                             |                     |
| <b>Breadth of OLTA participation</b> |                                   |                     |                                          |                     |                                    |                   |                                             |                     |
| no. of OLTAs (0–6)                   | <b>.16</b>                        | <b>(.13, .19)</b>   | <b>-.07</b>                              | <b>(-.13, -.00)</b> | <b>.06</b>                         | <b>(.00, .11)</b> | <b>1.15</b>                                 | <b>(1.10, 1.19)</b> |
| <b>FAS (low FAS = ref.)</b>          |                                   |                     |                                          |                     |                                    |                   |                                             |                     |
| Medium FAS (1)                       | <b>.39</b>                        | <b>(.33, .46)</b>   | -.08                                     | (-.22, .06)         | -.04                               | (-.16, .08)       | <b>1.13</b>                                 | <b>(1.03, 1.24)</b> |
| High FAS (2)                         | <b>.70</b>                        | <b>(.62, .79)</b>   | -.05                                     | (-.24, .14)         | .06                                | (-.09, .21)       | <b>1.46</b>                                 | <b>(1.30, 1.64)</b> |
| <b>Interaction effects</b>           |                                   |                     |                                          |                     |                                    |                   |                                             |                     |
| no. of OLTAs × FAS (1)               | <b>-.05</b>                       | <b>(-.08, -.02)</b> | -.03                                     | (-.11, .04)         | -.03                               | (-.09, .03)       | 1.02                                        | (.97, 1.06)         |
| no. of OLTAs × FAS (2)               | <b>-.06</b>                       | <b>(-.10, -.02)</b> | -.04                                     | (-.13, .05)         | .01                                | (-.07, .08)       | 1.03                                        | (.98, 1.09)         |

Note: data are beta coefficients (β) or odds ratio's (OR) and 95% confidence intervals (CI). ref. = reference category; OLTA = organized leisure-time activity, FAS = Family Affluence Scale. All the models were controlled for sex, age category, family structure, family support and peer support. Statistically significant values (p<0.05) are indicated in bold.

**Supplementary Table 2** Associations between participation in OLTAs and selected well-being indicators: Results from adjusted 3-level linear and logistic regression models with mixed effects; including the *pattern* of OLTA × FAS interaction term. Nine countries from the 2017/18 HBSC study.

|                                                       | Life satisfaction<br>(n = 45 683) |                     | Psychological complaints<br>(n = 44 693) |                     | Somatic complaints<br>(n = 44 754) |                     | Excellent self-rated health<br>(n = 45 900) |                     |
|-------------------------------------------------------|-----------------------------------|---------------------|------------------------------------------|---------------------|------------------------------------|---------------------|---------------------------------------------|---------------------|
|                                                       | β                                 | (95% CI)            | β                                        | (95% CI)            | β                                  | (95% CI)            | OR                                          | (95% CI)            |
| <b>Main effects</b>                                   |                                   |                     |                                          |                     |                                    |                     |                                             |                     |
| <b>Pattern of OLTA participation</b> (no OLTA = ref.) |                                   |                     |                                          |                     |                                    |                     |                                             |                     |
| OLTA non-sport (1)                                    | <b>.22</b>                        | <b>(.12, .33)</b>   | -.07                                     | (-.31, .16)         | -.05                               | (-.24, .14)         | 1.062                                       | (.90, 1.25)         |
| OLTA sport (2)                                        | <b>.45</b>                        | <b>(.35, .55)</b>   | <b>-.39</b>                              | <b>(-.62, -.17)</b> | <b>-.21</b>                        | <b>(-.39, -.02)</b> | <b>1.642</b>                                | <b>(1.42, 1.90)</b> |
| OLTA both (3)                                         | <b>.52</b>                        | <b>(.43, .62)</b>   | -.16                                     | (-.38, .06)         | .07                                | (-.11, .25)         | <b>1.514</b>                                | <b>(1.31, 1.75)</b> |
| <b>FAS</b> (low FAS = ref.)                           |                                   |                     |                                          |                     |                                    |                     |                                             |                     |
| Medium FAS (1)                                        | <b>.40</b>                        | <b>(.32, .49)</b>   | .02                                      | (-.17, .21)         | -.05                               | (-.20, .11)         | 1.118                                       | (.98, 1.28)         |
| High FAS (2)                                          | <b>.66</b>                        | <b>(.53, .78)</b>   | .20                                      | (-.09, .48)         | <b>.27</b>                         | <b>(.04, .50)</b>   | <b>1.368</b>                                | <b>(1.13, 1.65)</b> |
| <b>Interaction effects</b>                            |                                   |                     |                                          |                     |                                    |                     |                                             |                     |
| OLTA(1) * FAS (1)                                     | -.11                              | (-.23, .01)         | .07                                      | (-.20, .35)         | -.00                               | (-.23, .22)         | .925                                        | (.76, 1.12)         |
| OLTA(2) × FAS (1)                                     | <b>-.12</b>                       | <b>(-.24, -.01)</b> | -.22                                     | (-.49, .04)         | -.05                               | (-.17, .26)         | 1.014                                       | (.85, 1.20)         |
| OLTA(3) × FAS (1)                                     | <b>-.12</b>                       | <b>(-.23, -.01)</b> | <b>-.31</b>                              | <b>(-.56, -.05)</b> | -.13                               | (-.33, .08)         | 1.115                                       | .94, 1.32)          |
| OLTA(1) × FAS (2)                                     | -.09                              | (-.26, .08)         | .21                                      | (-.18, .59)         | -.07                               | (-.39, .24)         | 1.021                                       | (.79, 1.32)         |
| OLTA(2) × FAS (2)                                     | -.04                              | (-.20, .12)         | <b>-.47</b>                              | <b>(-.83, -.11)</b> | -.21                               | (-.50, .08)         | 1.074                                       | (.86, 1.35)         |
| OLTA(3) × FAS (2)                                     | -.12                              | (-.27, .03)         | <b>-.49</b>                              | <b>(-.84, -.15)</b> | -.25                               | (-.52, .03)         | 1.231                                       | (.99, 1.53)         |

Note: data are beta coefficients (β) or odds ratio's (OR) and 95% confidence intervals (CI). ref. = reference category; OLTA = organized leisure-time activity, FAS = Family Affluence Scale. All the models were controlled for sex, age category, family structure, family support and peer support. Statistically significant values (p<0.05) are indicated in bold.

**Supplementary Table 3** Associations between participation in OLTAs and selected well-being indicators: Results from adjusted 3-level linear and logistic regression models with mixed effects; including the *breadth of OA × Family structure* interaction term. Nine countries from the 2017/18 HBSC study.

|                                                 | Life satisfaction<br>(n = 45 683) |                     | Psychological complaints<br>(n = 44 693) |                     | Somatic complaints<br>(n = 44 754) |                   | Excellent self-rated health<br>(n = 45 900) |                     |
|-------------------------------------------------|-----------------------------------|---------------------|------------------------------------------|---------------------|------------------------------------|-------------------|---------------------------------------------|---------------------|
|                                                 | $\beta$                           | (95% CI)            | $\beta$                                  | (95% CI)            | $\beta$                            | (95% CI)          | OR                                          | (95% CI)            |
| <b>Main effects</b>                             |                                   |                     |                                          |                     |                                    |                   |                                             |                     |
| <b>Breadth of OLTA participation</b>            |                                   |                     |                                          |                     |                                    |                   |                                             |                     |
| no. of OLTAs (0–6)                              | <b>.11</b>                        | <b>(.09, .12)</b>   | <b>-.07</b>                              | <b>(-.11, -.04)</b> | <b>.04</b>                         | <b>(.01, .07)</b> | <b>1.17</b>                                 | <b>(1.15, 1.19)</b> |
| <b>Family structure</b> (nuclear family = ref.) |                                   |                     |                                          |                     |                                    |                   |                                             |                     |
| Single-parent family (1)                        | <b>-.43</b>                       | <b>(-.49, -.36)</b> | <b>.77</b>                               | <b>(.62, .92)</b>   | <b>.49</b>                         | <b>(.36, .61)</b> | <b>.82</b>                                  | <b>(.74, .91)</b>   |
| Stepfamily (2)                                  | <b>-.45</b>                       | <b>(-.55, -.36)</b> | .93                                      | (.71, 1.14)         | <b>.51</b>                         | <b>(.34, .68)</b> | <b>.72</b>                                  | <b>(.62, .83)</b>   |
| Non-parental family (3)                         | <b>-.64</b>                       | <b>(-.79, -.48)</b> | .98                                      | (.63, 1.33)         | <b>.55</b>                         | <b>(.27, .83)</b> | .94                                         | (.75, 1.18)         |
| <b>Interaction effects</b>                      |                                   |                     |                                          |                     |                                    |                   |                                             |                     |
| no. of OLTAs × Fam. Str. (1)                    | <b>.04</b>                        | <b>(.00, .07)</b>   | <b>-.10</b>                              | <b>(-.18, -.03)</b> | .00                                | (-.06, .06)       | .98                                         | (.93, 1.02)         |
| no. of OLTAs × Fam. Str. (2)                    | .00                               | (-.05, .05)         | .01                                      | (-.10, .12)         | .02                                | (-.07, .11)       | 1.02                                        | (.95, 1.09)         |
| no. of OLTAs × Fam. Str. (3)                    | <b>.10</b>                        | <b>(.03, .17)</b>   | -.09                                     | (-.26, .07)         | -.02                               | (-.16, .11)       | .96                                         | (.87, 1.07)         |

Note: data are beta coefficients ( $\beta$ ) or odds ratio's (OR) and 95% confidence intervals (CI). ref. = reference category; OLTA = organized leisure-time activity. All the models were controlled for sex, age category, Family Affluence Scale (FAS), family support and peer support. Statistically significant values ( $p < 0.05$ ) are indicated in bold.

**Supplementary Table 4** Associations between participation in OLTAs and selected well-being indicators: Results from adjusted 3-level linear and logistic regression models with mixed effects; including the *pattern* of OA × Family structure interaction term. Nine countries from the 2017/18 HBSC study.

|                                                       | Life satisfaction<br>(n = 45 683) |                     | Psychological complaints<br>(n = 44 693) |                     | Somatic complaints<br>(n = 44 754) |                     | Excellent self-rated health<br>(n = 45 900) |                     |
|-------------------------------------------------------|-----------------------------------|---------------------|------------------------------------------|---------------------|------------------------------------|---------------------|---------------------------------------------|---------------------|
|                                                       | β                                 | (95% CI)            | β                                        | (95% CI)            | β                                  | (95% CI)            | OR                                          | (95% CI)            |
| <b>Main effects</b>                                   |                                   |                     |                                          |                     |                                    |                     |                                             |                     |
| <b>Pattern of OLTA participation</b> (no OLTA = ref.) |                                   |                     |                                          |                     |                                    |                     |                                             |                     |
| OLTA non-sport (1)                                    | <b>.16</b>                        | <b>(.10, .22)</b>   | .07                                      | (-.08, .21)         | -.04                               | (-.15, .08)         | 1.00                                        | (.91, 1.10)         |
| OLTA sport (2)                                        | <b>.36</b>                        | <b>(.30, .42)</b>   | <b>-.57</b>                              | <b>(-.70, -.44)</b> | <b>-.17</b>                        | <b>(-.28, -.07)</b> | <b>1.68</b>                                 | <b>(1.55, 1.82)</b> |
| OLTA both (3)                                         | <b>.42</b>                        | <b>(.36, .47)</b>   | <b>-.39</b>                              | <b>(-.52, -.26)</b> | -.04                               | (-.15, .06)         | <b>1.70</b>                                 | <b>(1.57, 1.85)</b> |
| <b>Family structure</b> (nuclear family = ref.)       |                                   |                     |                                          |                     |                                    |                     |                                             |                     |
| Single-parent family (1)                              | <b>-.34</b>                       | <b>(-.44, -.25)</b> | <b>.80</b>                               | <b>(.59, 1.01)</b>  | <b>.52</b>                         | <b>(.35, .69)</b>   | <b>.85</b>                                  | <b>(.74, .99)</b>   |
| Stepfamily (2)                                        | <b>-.47</b>                       | <b>(-.60, -.35)</b> | <b>.88</b>                               | <b>(.59, 1.17)</b>  | <b>.62</b>                         | <b>(.39, .85)</b>   | <b>.67</b>                                  | <b>(.54, .84)</b>   |
| Non-parental family (3)                               | <b>-.67</b>                       | <b>(-.88, -.46)</b> | <b>.65</b>                               | <b>(.16, 1.14)</b>  | <b>.50</b>                         | <b>(.11, .89)</b>   | .86                                         | (.61, 1.22)         |
| <b>Interaction effects</b>                            |                                   |                     |                                          |                     |                                    |                     |                                             |                     |
| OA(1) × Fam. Str. (1)                                 | -.12                              | (-.25, .01)         | -.25                                     | (-.55, .00)         | -.02                               | (-.26, .22)         | 1.03                                        | (.84, 1.27)         |
| OA(2) × Fam. Str. (1)                                 | -.04                              | (-.16, .09)         | -.24                                     | (-.52, .00)         | -.13                               | (-.35, .10)         | .92                                         | (.76, 1.10)         |
| OA(3) × Fam. Str. (1)                                 | .03                               | (-.09, .15)         | <b>-.27</b>                              | <b>(-.53, -.00)</b> | .02                                | (-.19, .24)         | .88                                         | (.73, 1.05)         |
| OA(1) × Fam. Str. (2)                                 | .04                               | (-.14, .22)         | .00                                      | (-.41, .41)         | -.15                               | (-.48, .18)         | 1.03                                        | (.75, 1.41)         |
| OA(2) × Fam. Str. (2)                                 | .10                               | (-.07, .26)         | .01                                      | (-.30, .47)         | -.13                               | (-.43, .18)         | 1.09                                        | (.83, 1.43)         |
| OA(3) × Fam. Str. (2)                                 | -.02                              | (-.19, .14)         | .08                                      | (-.29, .45)         | -.05                               | (-.35, .24)         | 1.16                                        | (.89, 1.51)         |
| OA(1) × Fam. Str. (3)                                 | .12                               | (-.19, .43)         | .22                                      | (-.49, .94)         | -.13                               | (-.70, .44)         | 1.06                                        | (.64, 1.76)         |
| OA(2) × Fam. Str. (3)                                 | <b>.36</b>                        | <b>(.11, .68)</b>   | .42                                      | (-.24, 1.09)        | .05                                | (-.49, .58)         | 1.10                                        | (.71, 1.69)         |
| OA(3) × Fam. Str. (3)                                 | .24                               | (-.03, .51)         | .05                                      | (-.57, .66)         | .07                                | (-.43, .56)         | 1.00                                        | (.66, 1.51)         |

Note: data are beta coefficients (β) or odds ratio's (OR) and 95% confidence intervals (CI). ref. = reference category; OLTA = organized leisure-time activity. All the models were controlled for sex, age category, Family Affluence Scale (FAS), family support and peer support. Statistically significant values (p<0.05) are indicated in bold.
